# Supplementary material for: Pointing on the Other Side: Do Dogs Follow Contralateral Points?
Source: Preprints.org preprint supplement (doi:10.20944/preprints202401.1896.v1), 2024-01-26
Supplement: Supplementary file 1 [file supplementary]

## Sheet: SouthAl
Name	Type	Condition Started	PP 1 R	PP 2 L	DD 1 L	DD 2 L	DD 3 R	PP 3 L	DD 4 L	DD 5 L	PP 4 L	PP 5 R	DD 6 R	DD 7 R	PP 6 L	DD 8 R	PP 7 L	PP 8 R	PP 9 R	DD 9 L	PP 10 R	DD 10 R	PP 11 R	DD 11 R	PP 12 L	DD 12 R	DD 13 R	DD 14 L	PP 13 L	PP 14 R	DD 15 L	PP 15 R	DD 16 L	DD 17 L	PP 16 R	PP 17 L	PP 18 R	DD 18 R	DD 19 L	DD 20 R	PP 19 L	PP 20 L	PP Total	DD Total
Darby	Contra	Seated - 1st	0	1	1	1	0	1	1	1	1	0	0	0	1	1	1	0	0	0	1	1	0	0	0	1	0	0	1	0	1	0	0	0	0	0	0	0	0	0	0	1	5	8
Kona	Contra	Seated - 1st	1	0	1	1	1	0	1	1	1	0	0	0	1	1	1	0	0	1	1	1	1	1	1	0	0	0	0	0	1	1	1	0	1	0	1	1	1	1	1	1	14	14
Clover	Contra	Seated - 1st	0	0	0	0	1	1	0	1	1	0	1	0	1	0	1	0	0	1	0	1	0	0	1	0	0	1	1	0	1	0	1	1	0	1	0	0	1	0	1	1	11	10
Sherlock	Contra	Seated - 1st	0	1	1	1	0	1	1	0	0	0	1	1	1	1	0	0	1	0	1	0	0	0	0	1	0	0	0	1	0	0	0	1	0	1	0	1	1	0	0	1	7	10
Lola	Contra	Seated - 1st	0	1	1	1	0	0	1	1	1	0	0	1	1	0	0	0	0	0	0	0	0	0	1	0	0	1	1	0	1	0	1	1	0	1	0	1	0	0	1	0	9	10
Shadow	Contra	Standing - 1st	1	0	0	1	1	1	1	0	1	1	1	0	1	1	1	1	0	0	0	1	0	0	1	1	1	1	0	0	1	1	0	1	0	1	1	0	0	1	1	0	12	12
Link	Contra	Standing - 1st	0	1	1	1	1	1	0	1	1	0	0	1	1	1	1	1	0	1	0	0	1	1	1	1	1	1	1	0	1	0	1	1	0	0	0	0	1	1	1	1	14	16
DO	Contra	Seated - 1st	0	0	1	0	0	0	0	1	0	0	0	0	0	1	0	0	0	0	0	1	1	1	0	1	1	0	1	0	1	1	1	1	1	0	1	1	0	1	0	1	15	12
Sasha	ISP	Standing - 1st	0	0	0	0	1	1	1	1	0	0	1	1	1	1	1	1	1	0	1	0	1	1	0	1	1	0	0	1	0	1	0	0	1	1	1	1	1	0	0	1	12	11
Meela	ISP	Seated - 1st	1	1	1	1	0	1	1	1	1	0	1	1	1	1	1	1	1	1	0	0	0	1	1	1	0	1	1	0	1	0	1	1	0	0	1	0	1	1	1	1	13	16
Willow	ISP	Seated - 1st	1	1	1	0	0	1	1	1	1	1	0	0	1	0	1	1	1	1	1	0	1	0	0	1	0	1	0	1	1	1	1	1	1	1	1	0	1	0	0	0	12	10
Oliver	ISP	Seated - 1st	1	1	1	0	1	1	1	1	1	1	1	1	1	1	0	1	1	1	1	1	1	1	1	1	1	1	1	1	1	1	1	0	1	1	1	1	1	1	1	1	20	18
Dennis	ISP	Standing - 1st	1	1	1	1	0	1	1	1	1	0	1	1	0	1	0	1	1	0	0	1	0	0	1	1	1	0	0	1	1	1	0	0	1	0	1	1	0	1	0	0	11	13
Gill	ISP	Standing - 1st	0	0	0	1	0	0	1	1	1	0	0	1	1	1	1	0	1	1	1	1	0	1	1	1	1	1	1	1	1	1	1	0	0	1	1	1	1	0	1	1	17	15
Cali	ISP	Seated - 1st	1	1	1	1	1	1	1	1	1	0	0	1	1	0	1	0	1	1	1	1	0	1	0	1	1	0	1	1	0	1	0	1	0	1	0	1	1	0	0	0	11	14
Kona	ISP	Standing - 2nd	1	1	1	1	0	0	1	0	1	1	1	1	0	0	0	1	1	1	1	0	1	0	1	0	1	0	1	1	1	1	0	0	1	0	0	0	1	0	0	0	9	9
Clover	ISP	Seated - 2nd	0	1	1	1	0	1	1	1	1	0	1	0	1	1	1	0	0	0	1	1	0	1	0	0	1	0	0	1	0	0	0	0	0	0	0	1	0	1	1	1	8	11
DO	ISP	Standing - 2nd	1	0	0	0	1	0	0	0	0	1	1	1	0	1	1	1	1	0	1	1	1	1	0	1	1	0	0	1	0	1	0	0	1	0	1	1	0	1	0	0	11	10

## Sheet: HSSM
Name	study	ID	Type	TR 1 L	TR 2 L	TR 3 R	TR 4 R	TR 5 L	TR 6 R	TR 7 L	TR 8 R	TR 9 R	TR 10 L	TR 11 L	TR 12 R	TR 13 L	TR 14 L	TR 15 L	TR 16 R	TR 17 R	TR 18 L	TR 19 R	TR 20 R
Mordeci	USM1	25089212	Contra	1	1	0	0	1	0	1	1	1	1	1	1	1	1	1	0	0	1	1	0
Tiara	USM1	23356759	Contra	1	0	0	1	0	1	1	1	0	0	0	1	1	1	1	0	1	1	1	0
Tucker	USM1	28273688	Contra	1	1	1	0	1	1	1	0	0	1	1	0	1	1	1	0	1	1	1	0
Benji	USM1	A29610829	Contra	1	1	1	0	1	1	1	0	1	1	1	1	1	1	0	1	1	1	1	0
Poley	USM1	A23645031	Contra	1	1	0	0	0	1	1	1	1	1	0	1	1	0	1	1	1	1	0	1
Molly	USM1	A24076737	Contra	0	0	1	1	0	1	0	1	1	0	1	1	1	0	0	1	1	1	1	1
Sally	USM1	A30003104	Contra	1	1	1	0	1	1	1	0	0	0	0	0	0	1	1	1	1	1	1	0
Hazel	USM1	A30093381	Contra	0	1	1	0	1	1	1	1	1	1	1	0	0	1	1	1	1	1	1	0
Drogon	USM1	A19642286	Contra	0	1	1	1	1	1	0	1	1	0	1	0	0	1	0	1	1	0	1	1
Neauxla	USM1	A30326061	Contra	1	0	1	0	1	1	1	1	1	1	0	0	1	1	1	0	1	0	0	0
Tinsel	USM1	A30249919	Contra	0	1	1	0	0	1	1	1	1	1	0	1	0	1	1	1	1	1	1	0
Sparkle	USM1	A28526415	Contra	1	1	0	0	1	0	1	1	0	1	1	1	1	1	1	1	1	1	0	0
Hercules	USM2	24923145	Contra	1	1	0	1	1	0	1	0	1	0	0	0	1	0	1	1	1	1	0	1
Hannah	USM2	a29969836	Contra	1	0	0	1	0	0	0	1	0	1	0	1	1	0	1	1	0	1	1	1
